# Supplementary material for: Comprehensive genetic analysis of STRC variants in hereditary hearing impairment using long-read sequencing
Source: bioRxiv or medRxiv preprint supplement (doi:10.1101/2024.11.05.24316795), 2024-11-07
Supplement: Supplementary file [file media-1.pdf]

# Supplementary Material

## Comprehensive genetic analysis of *STRC* variants in hereditary hearing impairment using long-read sequencing

Cheng-Yu Tsai<sup>1,2</sup>, Yue-Sheng Lu<sup>1</sup>, Yu-Ting Chiang<sup>2</sup>, Ming-Yu Lo<sup>1</sup>, Pei-Hsuan Lin<sup>1,3</sup>, Shih-Feng Tsai<sup>4,5</sup>, Chuan-Jen Hsu<sup>1,6</sup>, Pei-Lung Chen<sup>2,3,7,8</sup>\*, Jacob Shu-Jui Hsu<sup>2</sup>\*, and Chen-Chi Wu<sup>1,2,9,10</sup>\*

- 1) Department of Otolaryngology, National Taiwan University Hospital, 100225 Taipei, Taiwan.
- 2) Graduate Institute of Medical Genomics and Proteomics, College of Medicine, National Taiwan University, 100233 Taipei, Taiwan.
- 3) Graduate Institute of Clinical Medicine, National Taiwan University College of Medicine, 100229 Taipei, Taiwan.
- 4) Institute of Molecular and Genomic Medicine, National Health Research Institute, 350401 Miaoli, Taiwan.
- 5) Department of Life Sciences and Institute of Genome Sciences, National Yang-Ming University, 112304 Taipei, Taiwan
- 6) Department of Otolaryngology, Buddhist Tzuchi General Hospital, 427003 Taichung, Taiwan
- 7) Institute of Molecular Medicine, National Taiwan University College of Medicine, 100225 Taipei, Taiwan
- 8) Department of Medical Genetics, National Taiwan University Hospital, 100226 Taipei, Taiwan
- 9) Department of Medical Research, National Taiwan University Hospital Hsin-Chu Branch, Hsinchu 302041, Taiwan
- 10) Department of Otolaryngology, National Taiwan University Hospital Hsin-Chu Branch, Hsinchu 302041, Taiwan

\* **Correspondence:** Pei-Lung Chen (P.-L.C.), Jacob Shu-Jui Hsu (J.-S.H), and Chen-Chi Wu (C.-C.W.)

- Graduate Institute of Medical Genomics and Proteomics, National Taiwan University College of Medicine, No.1 Jen-Ai Road Sec.1, 100233 Taipei, Taiwan (P.-L.C.) & (J.-S.H);  
paylong@ntu.edu.tw (P.-L.C.) jacobhsu@ntu.edu.tw (J.-S.H)
- Department of Otolaryngology, National Taiwan University Hospital, No.7 Chung-Shan South Rd., 100225 Taipei, Taiwan (C.-C.W.); chenchiwu@ntuh.gov.tw (C.-C.W.)

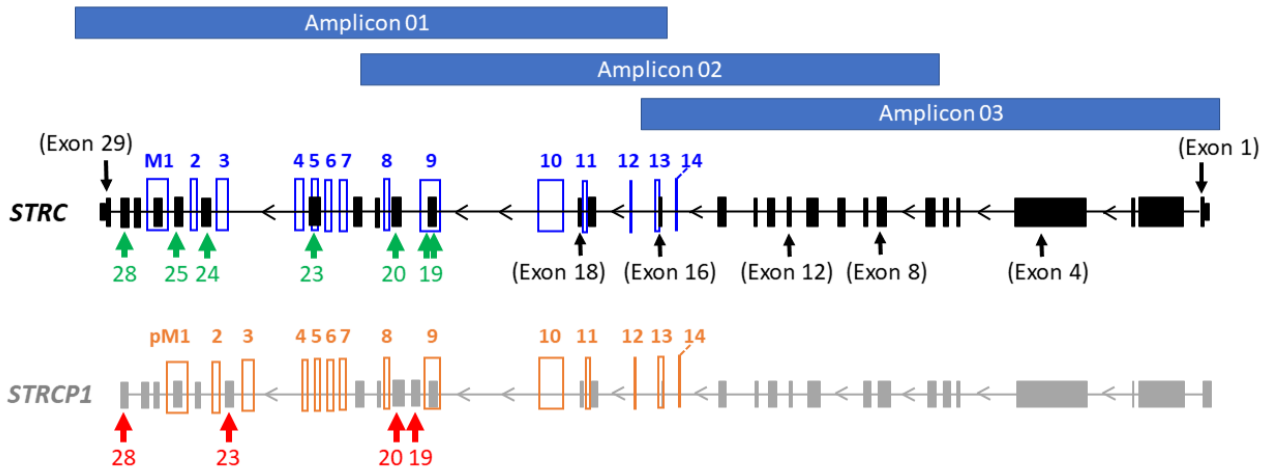

**Figure S1.** The overall locations of *STRC*/*STRCP1* divergent marker clusters on genomic regions and 10kb amplicons (Amplicon 01-03). The 14 marker clusters are used for calculating the refined copy number (rCN) ratios of *STRC* (blue boxes) and *STRCP1* (orange boxes). The probe locations of multiplex ligation-dependent MLPA assays in *STRC* (green arrows) and *STRCP1* (red arrows).

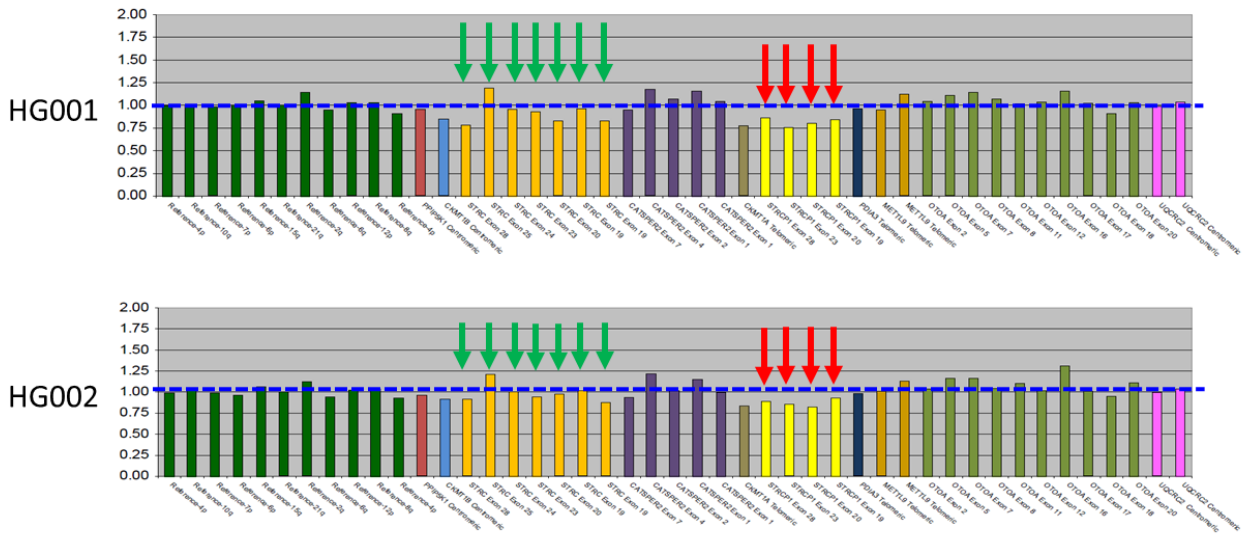

**Figure S2.** The MLPA plots on NIST reference samples HG001 and HG002. Seven probes (in orange) for *STRC* and four probes (in yellow) for *STRCP1* show the trend of normal copy number. Green arrows: the MLPA signal peaks for *STRC*; red arrows: the MLPA signal peaks for *STRCP1*; y-axis: copy number compared to wild-type controls; blue dashed line: the baseline of normal copy number (copy number = 1.00). (Abbreviations) NIST: National Institute of Standards and Technology; MLPA: multiplex ligation-dependent probe amplification.

```

43892158 CTTGCTGTTCTGGGCTCTCCTTTCCCTCATGTTGGGCCCATGCAACTGCT 43892207
>>>>>> |||||  >>>>>>
43991974 CTTGCTGTTCTGGGCTCTCCTTTCCCTCATGTTGGGCCCATGCAACTGCT 43992023

43892208 CGTCGCTGCTCAGGACTCAGAAAGGCCATTTGCTCAGGAGTGACAGCCAC 43892257
>>>>>> |||||  >>>>>>
43992024 CGTCGCTGCTCAGGACTCAGAAAGGCCATTTGCTCAGGAGTGACAGCCAC 43992073

43892258 AGCCTGAGCACTGGT GGAGACTAGATAGTTGGATGGGACTAAACACCAC 43892305
>>>>>> |||||  >>>>>>
43992074 AGCCTGAGCACTGGC CGAGACTAGATAGTTGGATGGGACTAAACACCAC 43992121

```

**Figure S3** Pairwise alignment of exon28 between *STRC* and *STRCP1*. The only divergent single nucleotide (in red box) is hg19:chr15-43892272-T (in *STRC*) and hg19:chr15-43992088-C (in *STRCP1*).

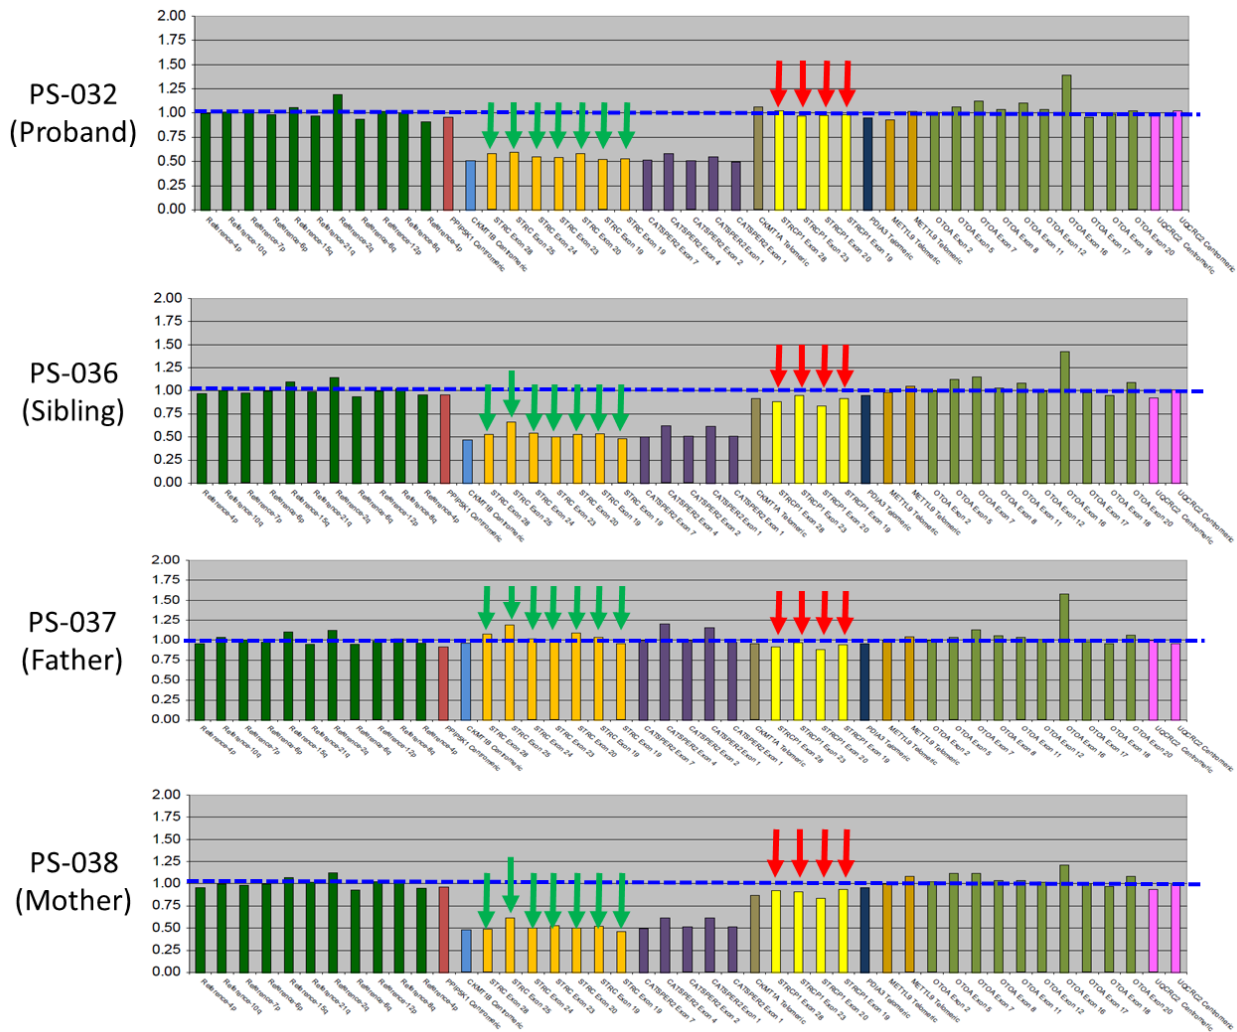

**Figure S4.** MLPA signal plots of the HHI multiplex family (PS-032, -036, -037, -038). A heterozygous deletion found in both proband (PS-032) and sibling (PS-036) was confirmed to be inherited from the maternal allele (PS-038).

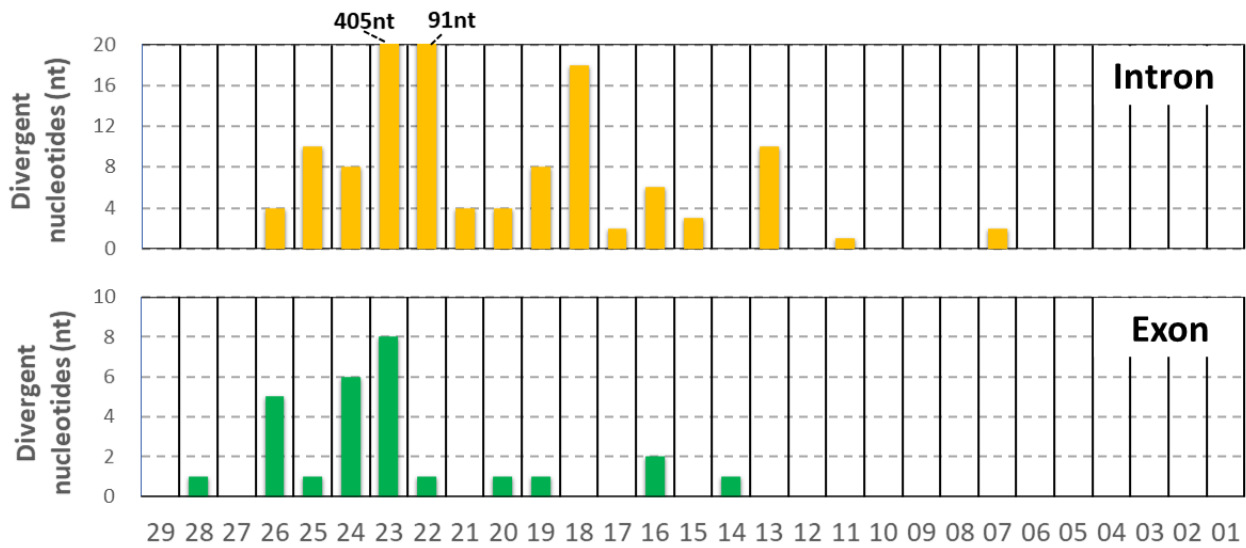

**Figure S5.** Statistical plot of *STRC/STRCP1* divergent nucleotides. The divergent content of each exon/intron is calculated by pairwise sequence alignment between *STRC* (NM\_153700.2) and *STRCP1* (NR\_146078.1).

**Table S1.** The expected regions of 10kb *STRC/STRCP1* amplicons

| Amplicon ID<br>(PCR primers)  | <i>STRC</i> (NM_153700.2)<br>chr15: 43891761-43910998 | <i>STRCP1</i> (NR_146078.1)<br>chr15:43991616-44010458 | Genomic regions<br>( <i>STRC</i> ) |
|-------------------------------|-------------------------------------------------------|--------------------------------------------------------|------------------------------------|
| Amplicon 01<br>(LRP4-F & 3-R) | chr15:43891467-43901563<br>(10,097 bp)                | chr15:43991283-44001035<br>(9,753 bp)                  | 3'-UTR to Intron 15                |
| Amplicon 02<br>(LRP3-F & 2-R) | chr15:43896367-43906352<br>(9,986 bp)                 | chr15:43995847-44005814<br>(9,968 bp)                  | Intron 21 to Intron 06             |
| Amplicon 03<br>(LRP2-F & 1-R) | chr15:43901215-43911482<br>(10,268 bp)                | chr15:44000687-44010944<br>(10,268 bp)                 | Intron 16 to 5'-UTR                |

**Table S2.** Exonic variants within exon 1 to 18 caused by *STRCP1* conversion

| Variant locus (GRCh37)<br>HGVS (NM_153700.2)                  | ClinVar | Grpmax_AF #       | Number of<br>Homozygotes # | Corresponding REF<br>nucleotide of <i>STRCP1</i> |
|---------------------------------------------------------------|---------|-------------------|----------------------------|--------------------------------------------------|
| <i>chr15-43901476-C-T</i><br>Exon 16: c.3555G>A<br>(p.L1185=) | LB      | N/A               | N/A                        | <i>chr15-44000946-T</i>                          |
| <i>chr15-43901491-A-C</i><br>Exon 16: c.3540T>G<br>(p.L1180=) | B       | 0.004051<br>(AFR) | 20                         | <i>chr15-44000983-C</i>                          |
| <i>chr15-43903129-A-G</i><br>Exon 14: c.3360T>C<br>(p.C1120=) | B / LB  | 0.02009<br>(ASJ)  | 338                        | <i>chr15-44002601-G</i>                          |

# “Grpmax\_AF” and “Number of Homozygotes” were retrieved from database gnomAD (ver2.1.1).  
(Abbreviations) AFR: African; ASJ: Ashkenazi Jewish

**Table S3.** False-positive *STRC* variants in this study

| Variant locus of <i>STRC</i> (GRCh37)<br>HGVS (NM_153700.2) | Predictive scores #                         | Variant locus on<br><i>STRCP1</i> (GRCh37) | Applied<br>marker cluster |
|-------------------------------------------------------------|---------------------------------------------|--------------------------------------------|---------------------------|
| <i>chr15-43892272-T-C</i><br>Exon 28: c.5125A>G (p.T1709A)  | SIFT (D);<br>PolyPhen-2 (D)<br>CADD (23.9)  | <i>chr15-43992088-C-T</i>                  | M1                        |
| <i>chr15-43892822-C-A</i><br>Exon 26: c.4903G>T (p.V1635F)  | SIFT (T);<br>PolyPhen-2 (PD)<br>CADD (22.2) | <i>chr15-43992640-A-C</i>                  | M1                        |
| <i>chr15-43893673-C-T</i><br>Exon 24: c.4622G>A (p.R1541Q)  | SIFT (T)<br>PolyPhen-2 (PD)<br>CADD (22.2)  | <i>chr15-43993491-T-C</i>                  | M3                        |
| <i>chr15-43896918-G-A</i><br>Exon 20: c.4057C>T (p.Q1353X)  | CADD (42)                                   | <i>chr15-43996398-A-G</i>                  | M8                        |

# Both SIFT and PolyPhen-2 predictions were queried from Deafness Variation Database (ver. 9, <https://deafnessvariationdatabase.org/>); CADD scores were queried based on GRCh37-v1.7 database (<https://cadd.gs.washington.edu/snv>).

(Other abbreviations) HGVS: Human Genome Variation Society; (SIFT & PolyPhen-2) D: damaging; PD: possibly damaging; T: tolerant
